# Supplementary material for: Molecular insights into the self-assembly of short amphiphilic peptides FmDn and FmKn
Source: Royal Society of Chemistry journal article supplement (doi:10.1039/c4ra10571k), 2014-01-01
Supplement: c4ra10571k1.pdf [file c4ra10571k1.pdf]

## Electronic Supplementary Information

### **Molecular insights into the self-assembly of short amphiphilic peptides $F_mD_n$ and $F_mK_n$**

Naresh Thota, Yijia Ma and Jianwen Jiang\*

*Department of Chemical and Biomolecular Engineering, National University of Singapore, 117576,  
Singapore*

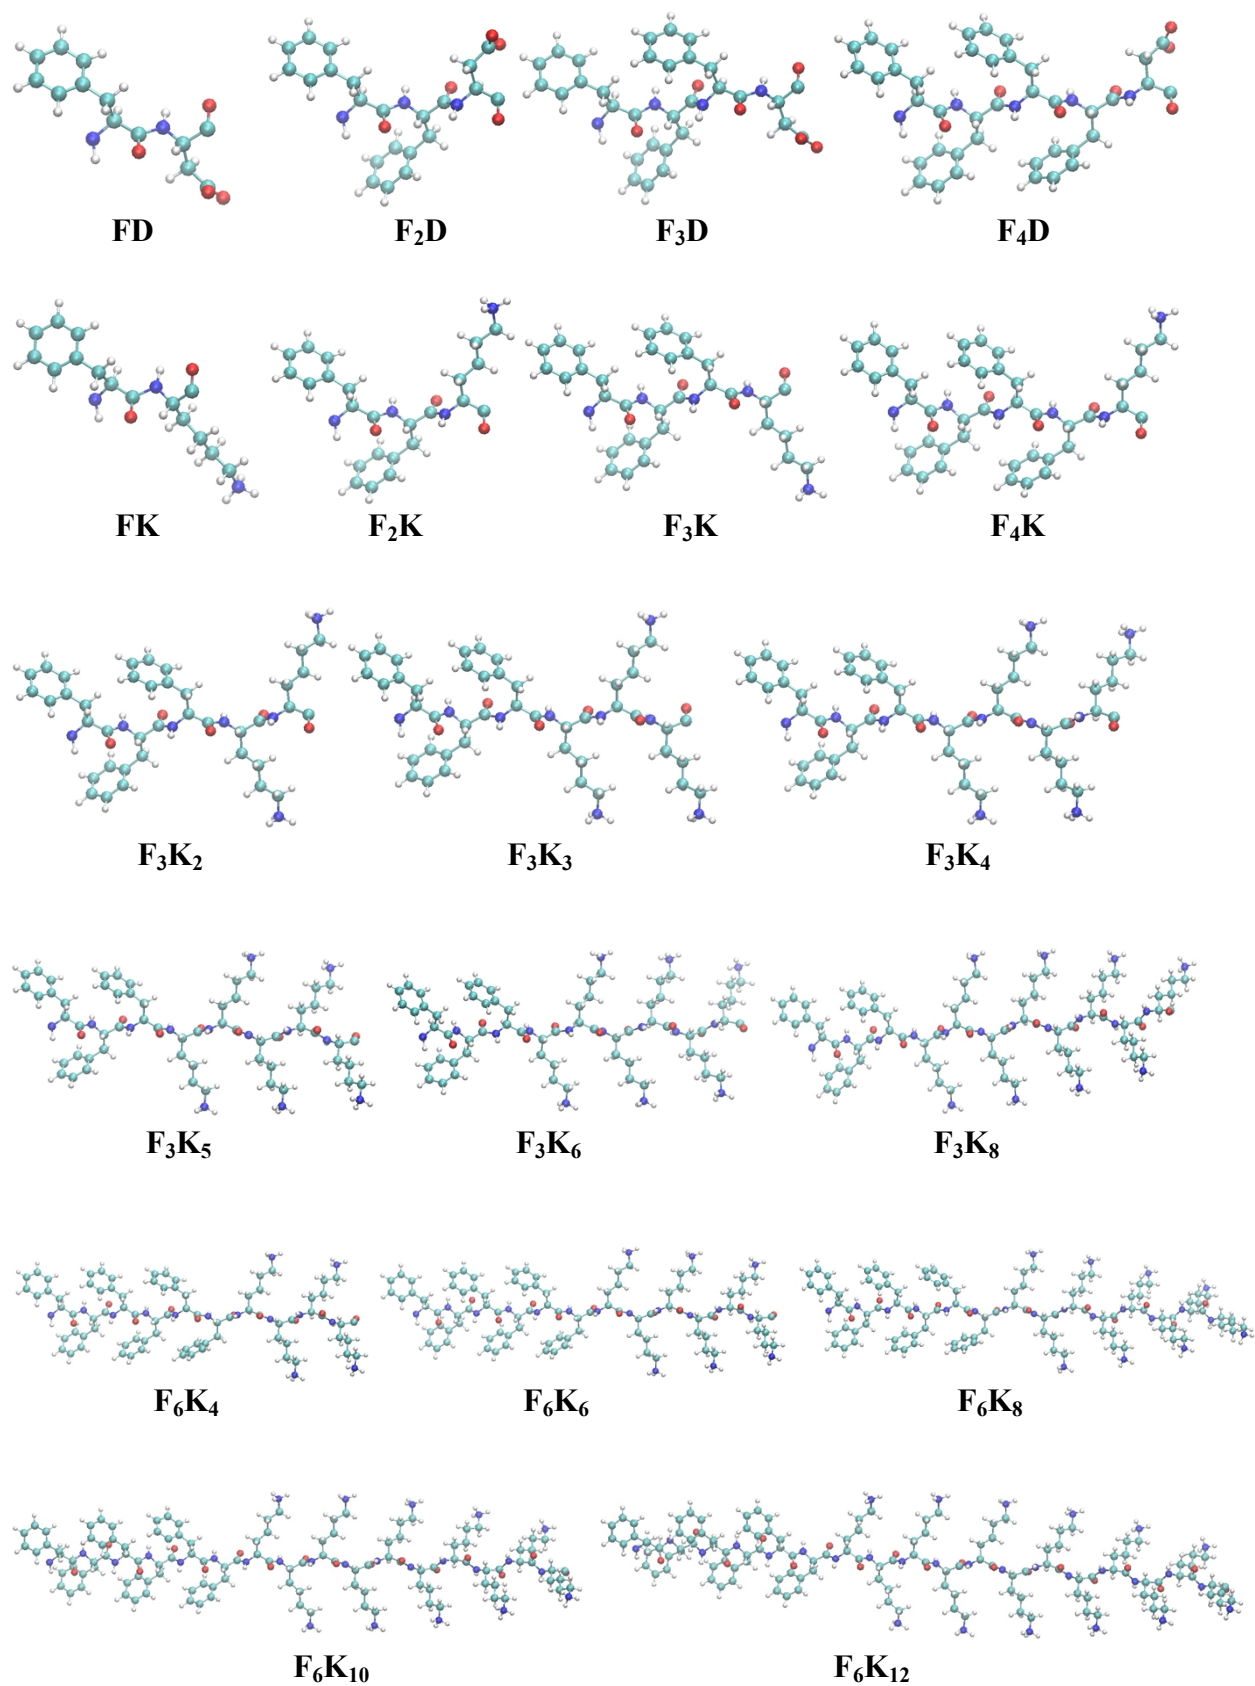

**Fig. S1** Atomistic representations of peptides  $F_mD_n$  and  $F_mK_n$ .  
N: blue, O: red, C: cyan, and H: white.

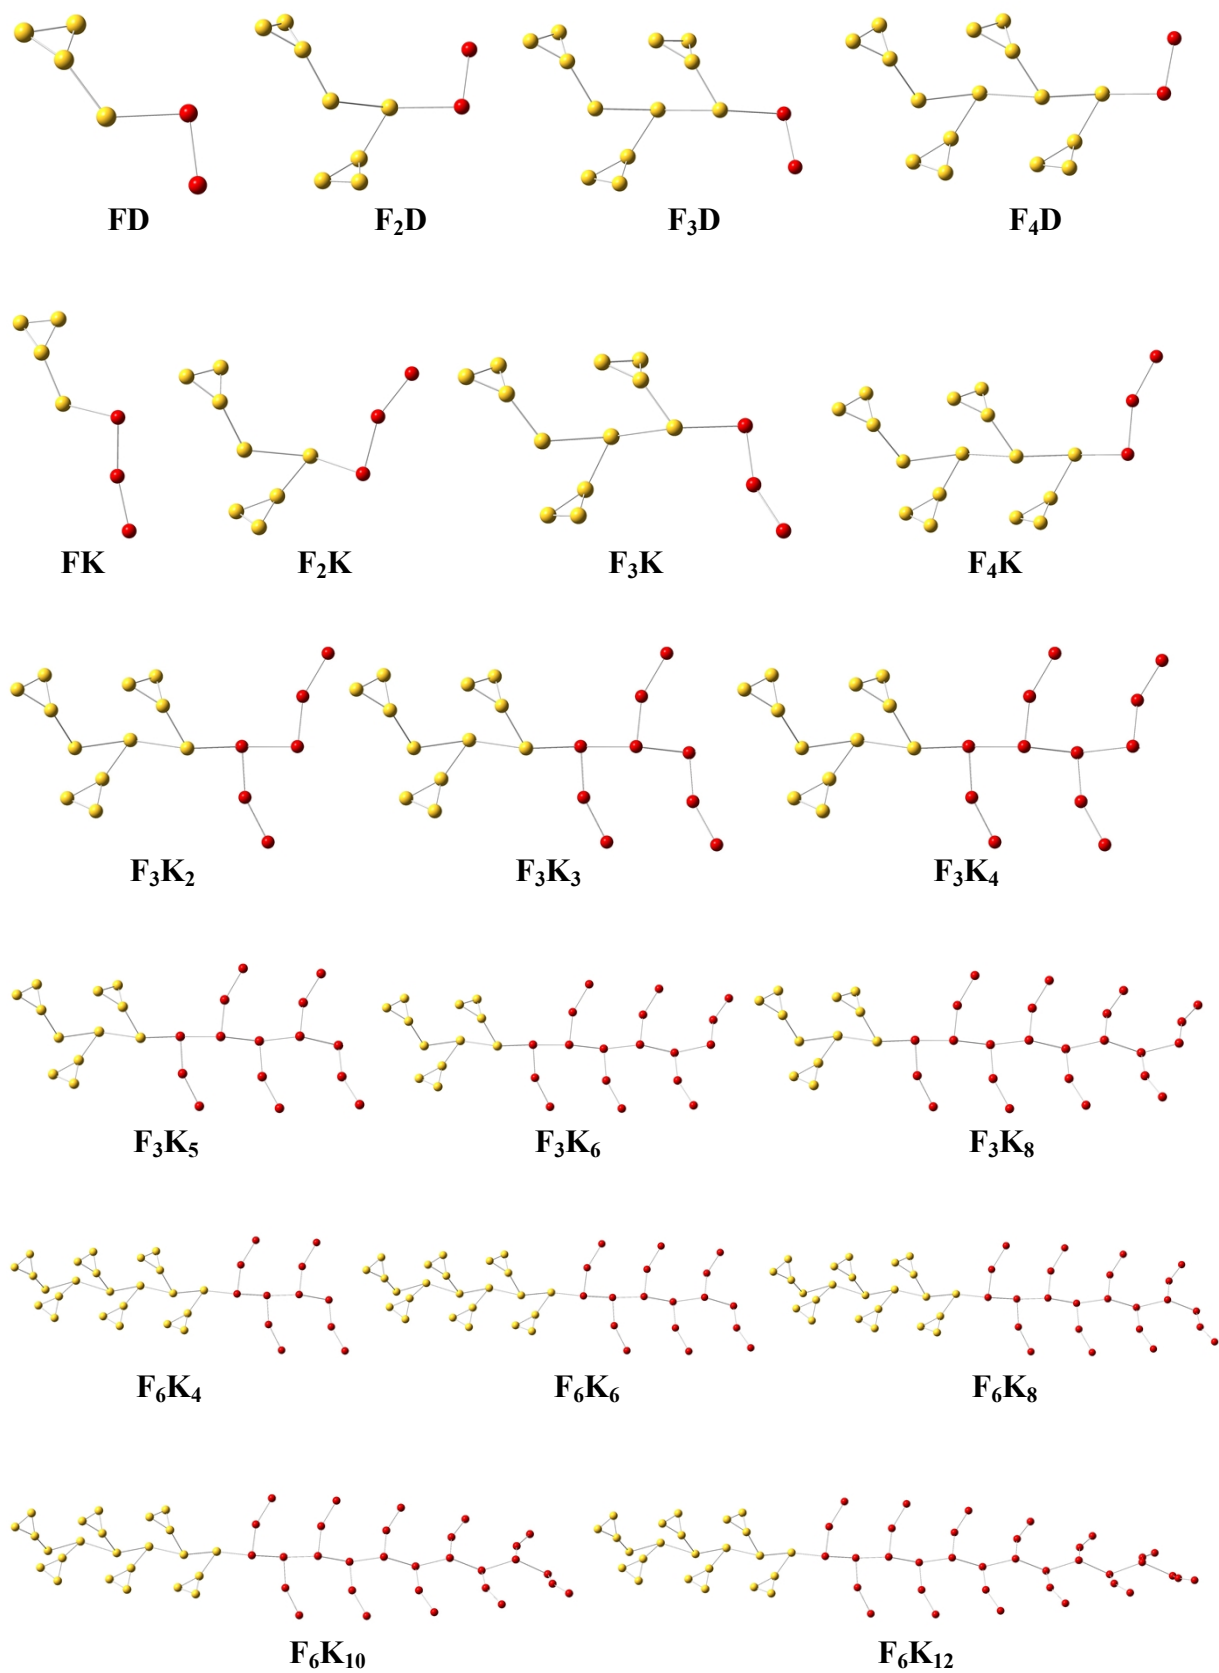

**Fig. S2** CG representations of  $F_mD_n$  and  $F_mK_n$  peptides using the MARTINI model. F: yellow, D and K: red.

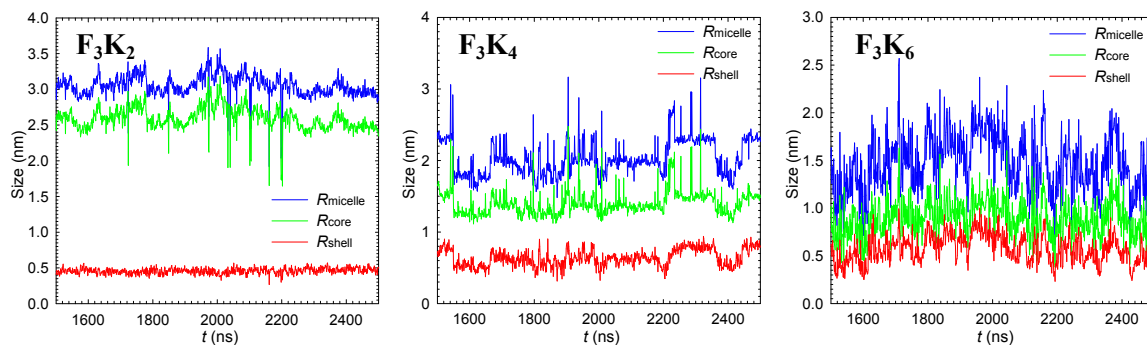

**Fig. S3** Radii of micelle ( $R_{\text{micelle}}$ ), core ( $R_{\text{core}}$ ) and shell ( $R_{\text{shell}}$ ) for  $F_3K_2$ ,  $F_3K_4$  and  $F_3K_6$ .

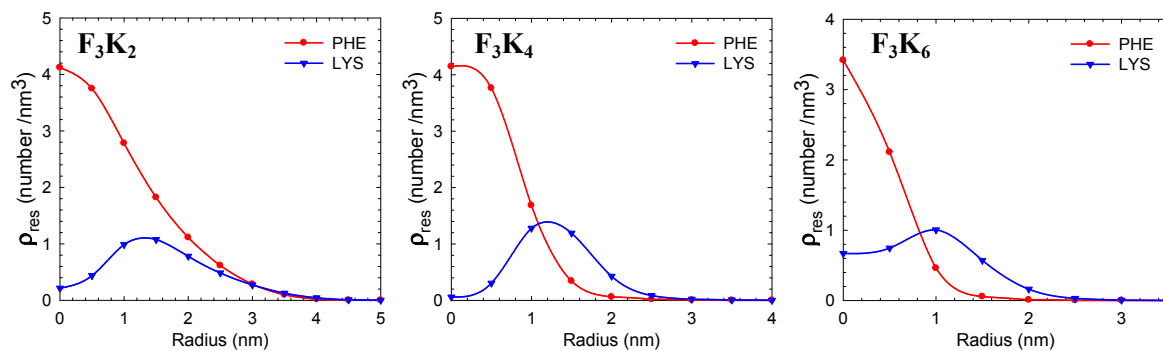

**Fig. S4** Density profiles for  $F_3K_2$ ,  $F_3K_4$  and  $F_3K_6$ . The micelles contain 58, 10 and 5 peptides, respectively.

**Table S1.** Interaction energies (kJ/mol) at free and aggregated states.

| Peptide  | Free State    |          | Aggregated State |           |
|----------|---------------|----------|------------------|-----------|
|          | Electrostatic | LJ       | Electrostatic    | LJ        |
| $F_3K$   | -112.82       | -4134.99 | -317.83          | -14048.97 |
| $F_4K$   | -57.79        | -2137.47 | -260.06          | -15244.91 |
| $F_3K_2$ | -20.80        | -2425.49 | -94.08           | -12779.62 |

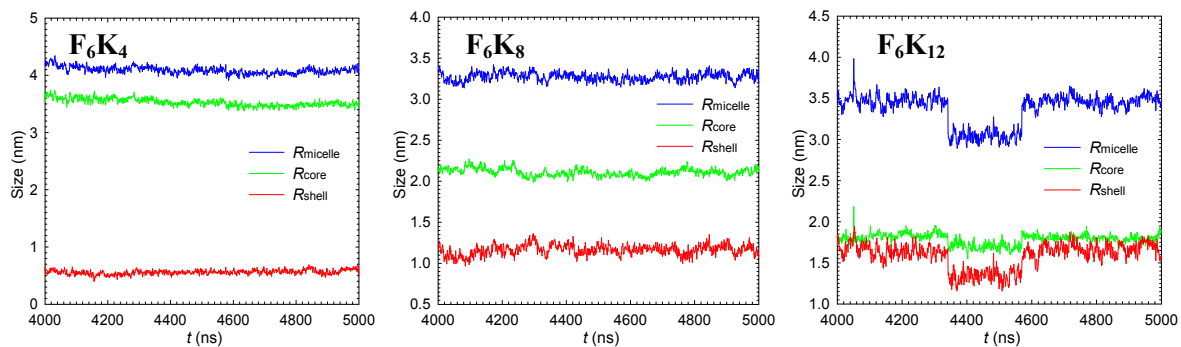

**Fig. S5** Radii of micelle ( $R_{\text{micelle}}$ ), core ( $R_{\text{core}}$ ) and shell ( $R_{\text{shell}}$ ) for  $F_6K_4$ ,  $F_6K_8$  and  $F_6K_{12}$ .

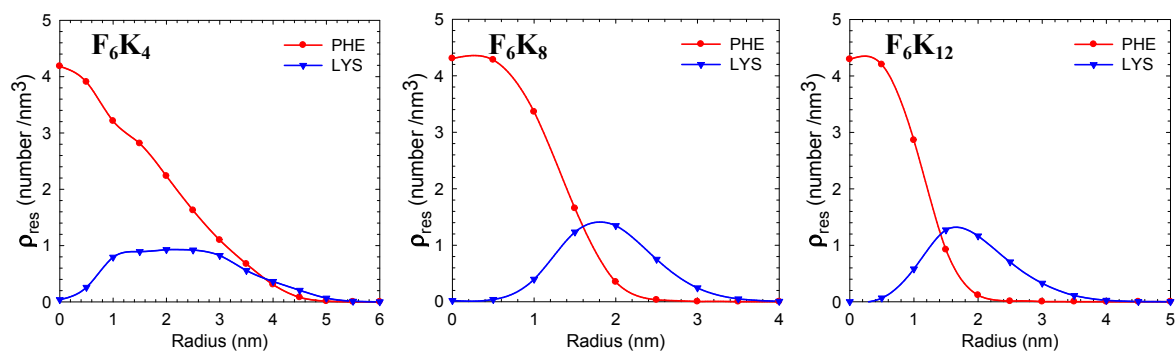

**Fig. S6** Density profiles for  $F_6K_4$ ,  $F_6K_8$  and  $F_6K_{12}$ . The micelles contain 72, 16 and 11 peptides, respectively.
